# Supplementary material
Source: PubMed Central journal article supplement (PMC6668686)

**Supplemental Table 1: Antibodies**

| <b>Antibody</b>   | <b>Species</b> | <b>Manufacturer</b>       | <b>Catalogue Number</b> | <b>Dilution/Remarks</b> |
|-------------------|----------------|---------------------------|-------------------------|-------------------------|
| Anti-DAT (MAB369) | Rat            | Millipore Sigma           | MAB 369                 | 1:1000                  |
| Anti-Rat-HRP      | Goat           | Thermo Fisher Scientific  | 31470                   | 1:5000                  |
| Anti-TH           | Rabbit         | Cell Signaling Technology | 2792                    | 1:1000                  |
| Anti-pTH (Ser 31) | Rabbit         | Cell Signaling Technology | 3370                    | 1:1000                  |
| Anti-pERK1/2      | Rabbit         | Cell Signaling Technology | 9101                    | 1:1000                  |
| Anti-ERK1/2       | Rabbit         | Cell Signaling Technology | 9102                    | 1:1000                  |
| Anti-Actin I-19   | Goat           | Santa Cruz Biotechnology  | SC-1616                 | 1:5000                  |
| Anti-Rabbit-HRP   | Donkey         | Thermo Fisher Scientific  | A16023                  | 1:5000                  |

**Supplemental Table 2: Ratio of DA to its metabolites in striatum**

| <b>Ratio</b> | <b>WT</b><br>(mean $\pm$ SEM) | <b>DAT T356M<sup>+/+</sup></b><br>(mean $\pm$ SEM) | <b>p</b> |
|--------------|-------------------------------|----------------------------------------------------|----------|
| DA/DOPAC     | 17.01 $\pm$ 0.55              | 9.547 $\pm$ 0.63                                   | <0.0001  |
| DA/3-MT      | 18.28 $\pm$ 2.175             | 5.047 $\pm$ 0.70                                   | <0.0001  |
| DA/HVA       | 9.149 $\pm$ 0.65              | 1.87 $\pm$ 0.17                                    | <0.0001  |
| 5-HT/5-HIAA  | 3.115 $\pm$ 0.32              | 2.042 $\pm$ 0.26                                   | 0.9026   |

**Supplemental Table 3: Incidence of observed behaviors**

| <b>Behavior</b> | <b>WT</b><br>(mean $\pm$ SEM) | <b>DAT T356M<sup>+/+</sup></b><br>(mean $\pm$ SEM) | <b>p</b> |
|-----------------|-------------------------------|----------------------------------------------------|----------|
| Digging         | 28 $\pm$ 4                    | 16 $\pm$ 3                                         | 0.0773   |
| Grooming        | 14 $\pm$ 1                    | 13 $\pm$ 1                                         | 0.9997   |
| Rearing         | 71 $\pm$ 5                    | 123 $\pm$ 9                                        | <0.0001  |
| Tail Flick      | 3 $\pm$ 1                     | 4 $\pm$ 1                                          | 0.9999   |
| Jumping         | 0 $\pm$ 1                     | 1 $\pm$ 1                                          | >0.9999  |
| Climbing        | 11 $\pm$ 2                    | 20 $\pm$ 4                                         | 0.3523   |

**Supplemental Table 4: Effect of ACT-01 on HEK-hDAT, HEK-hSERT and HEK-hNET cells**

| <b>HEK-hDAT cells</b>                                   | <b>ACT-01</b> | <b>Cocaine</b> |
|---------------------------------------------------------|---------------|----------------|
| [ <sup>125</sup> I]RTI-55 Binding Ki (nM)               | 710 ± 170     | 595 ± 59       |
| Hill coefficient                                        | -0.87 ± 0.07  | -1.06 ± 0.11   |
| [ <sup>3</sup> H]Dopamine Uptake IC <sub>50</sub> (nM)  | 276 ± 36      | 370 ± 110      |
| <b>HEK-hSERT cells</b>                                  | <b>ACT-01</b> | <b>Cocaine</b> |
| [ <sup>125</sup> I]RTI-55 Binding Ki (nM)               | >9100#        | 468 ± 49       |
| Hill coefficient                                        |               | -0.93 ± 0.04   |
| [ <sup>3</sup> H]Serotonin Uptake IC <sub>50</sub> (nM) | >10 μM        | 286 ± 19       |
| <b>HEK-hNET cells</b>                                   | <b>ACT-01</b> | <b>Cocaine</b> |
| [ <sup>125</sup> I]RTI-55 Binding Ki (nM)               | >9,800#       | 2,240 ± 320    |
| Hill coefficient                                        |               | -1.12 ± 0.15   |
| [ <sup>3</sup> H]NE Uptake IC <sub>50</sub> (nM)        | >6,000        | 203 ± 14       |

Full Unedited Gel for Figure 1D (Actin)

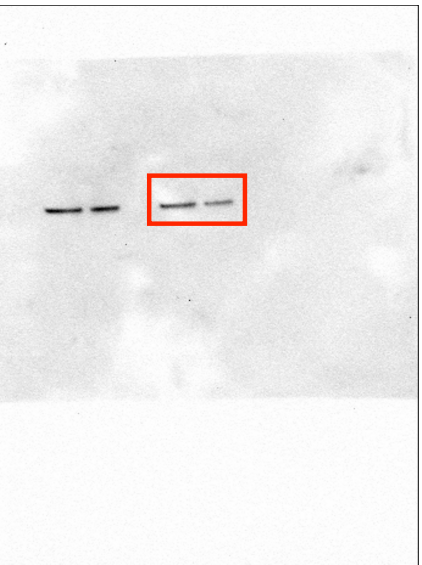

Location: E:/DAT T356M Western Blots/Set 2/Actin

Printed: 10/20/2017 9:18 AM

MCBR ChemiDoc 2017-10-19\_10h26m15s\_Exposure\_1...

### Full Unedited Gel for Figure 1D (DAT)

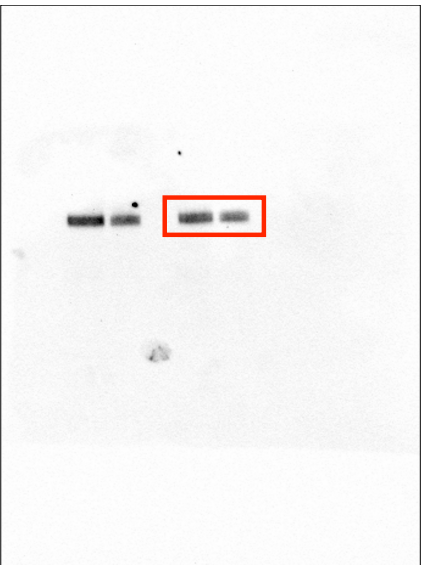

Location: C:/Users/MCBR ChemiDoc/Documents/Gallilab  
Printed: 10/19/2017 10:29 AM

Full Unedited Gel for Figure 2C (pTH)

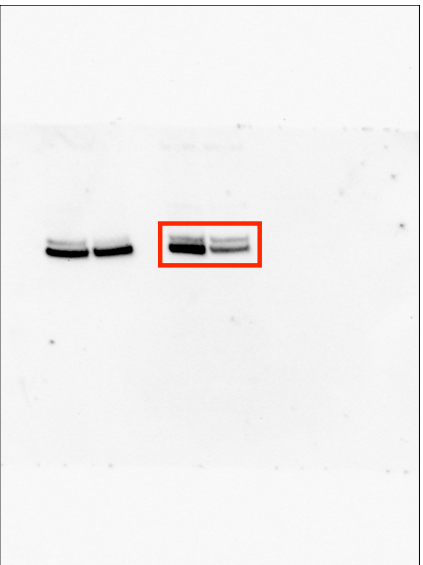

Full Unedited Gel for Figure 2C (TH)

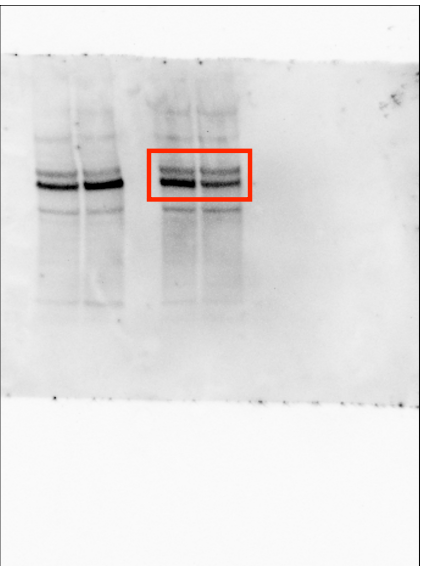



04122018\_DATT356M\_Striatum\_251\_253\_258\_256\_tot...

**Full Unedited Gel for Figure 2E (ERK)**

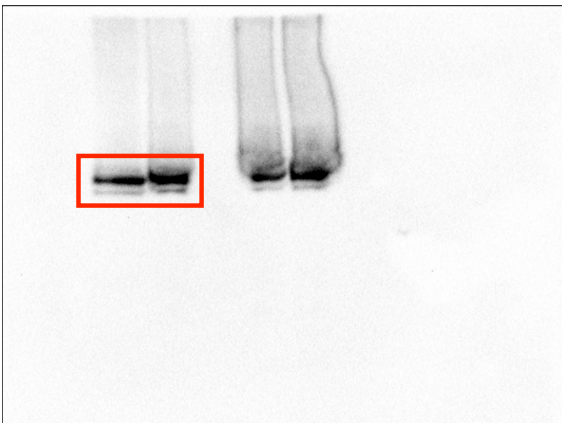

04102018\_DATT356M\_Striatum\_251\_253\_258\_256\_pE...

**Full Unedited Gel for Figure 2E (pERK)**

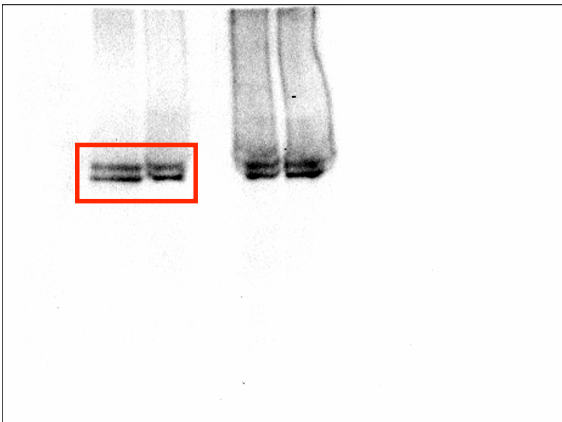

Supplement: jci-129-127411-s007.pdf [file jci-129-127411-s007.pdf]
